# Supplementary material for: Topical VEGF-C/D Inhibition Prevents Lymphatic Vessel Ingrowth into Cornea but Does Not Improve Corneal Graft Survival
Source: MDPI journal article supplement (doi:10.3390/jcm9051270), 2020-04-28
Supplement: s1 [file s1]

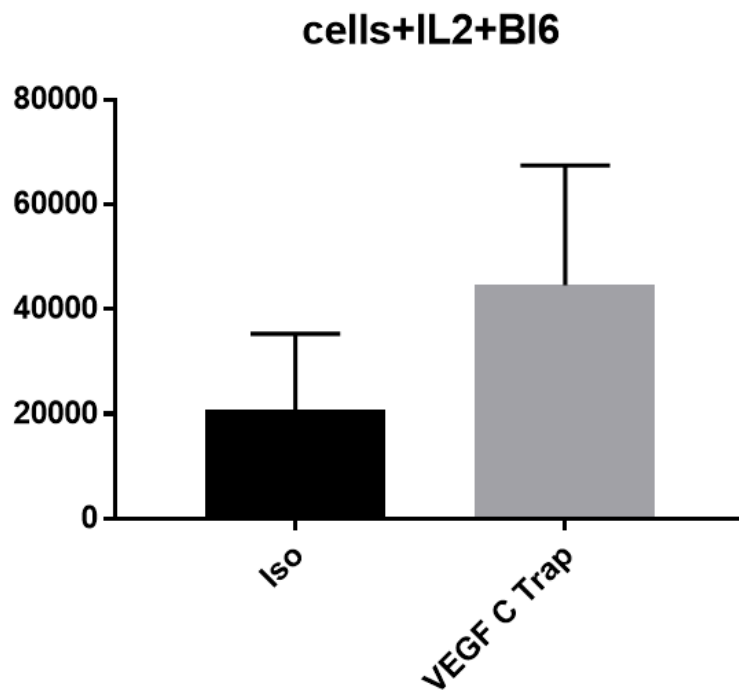

**Figure S1.** Increased stimulatory activity of VEGF-C/D trap treated antigen presenting cells. Stimulation response of draining lymph node immune cells (cells) to allogeneic stimulus of growth arrested C57BL/6 cells (Bl6) and addition of IL2 (n.s.; n = 3, representative data from two independent experiments).
